# Supplementary material
Source: publisher figshare collection journal article supplement (https://frontiersin.figshare.com/ndownloader/files/30893779)

**Figure S.5:** Same as Figure S.4 but vertically averaged annually over surface to 100m depth for the last four years leading up to an IOD event. Significant correlations at 95% and 90% confidence are shown as contour lines (value at 0.27 and 0.23 respectively).

CanCM4

MIROC5

-4

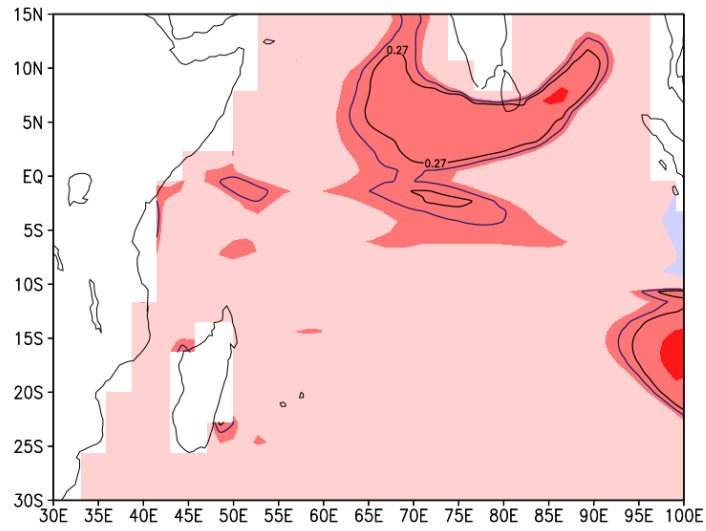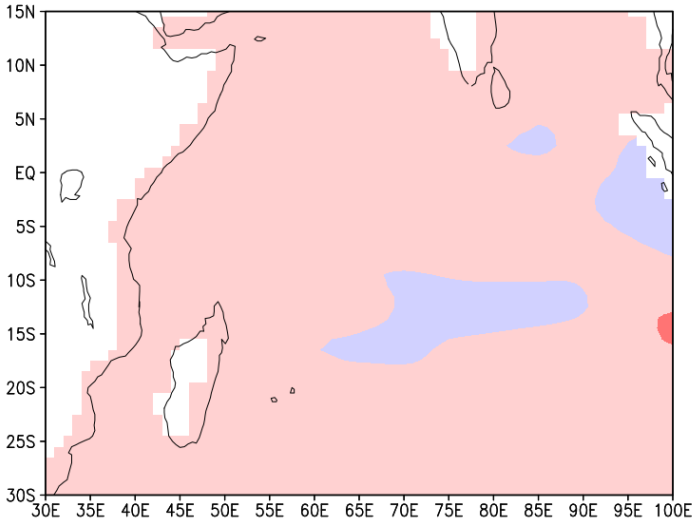

-3

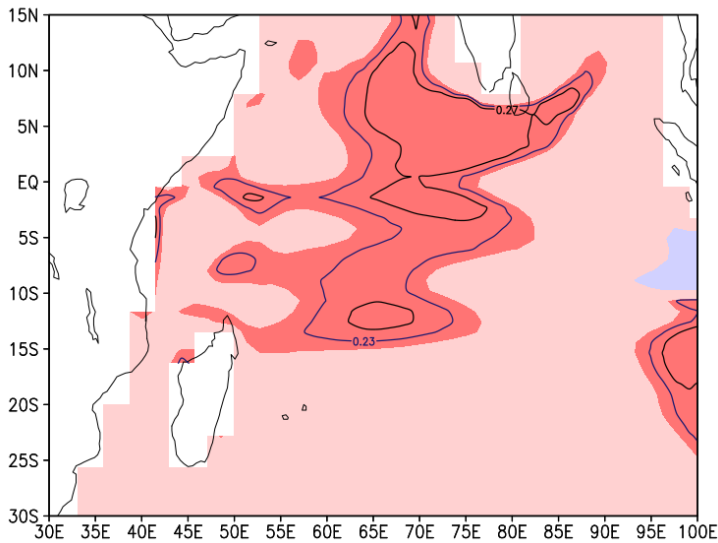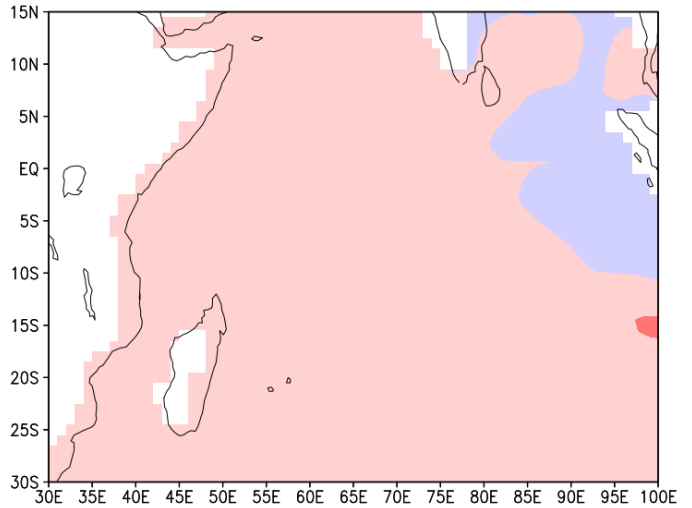

-2

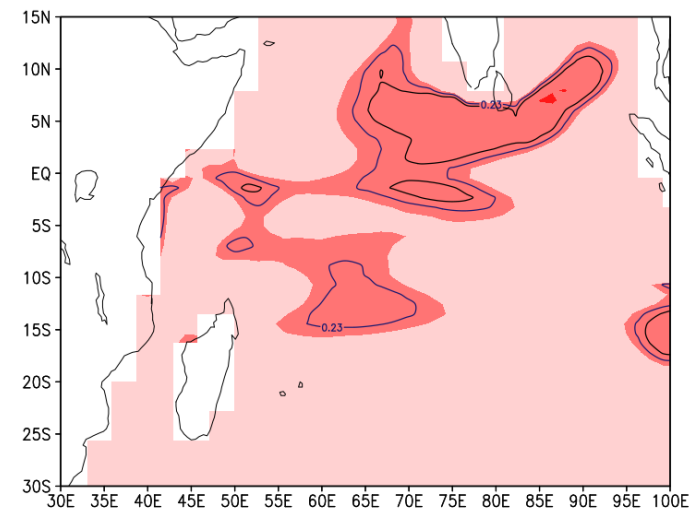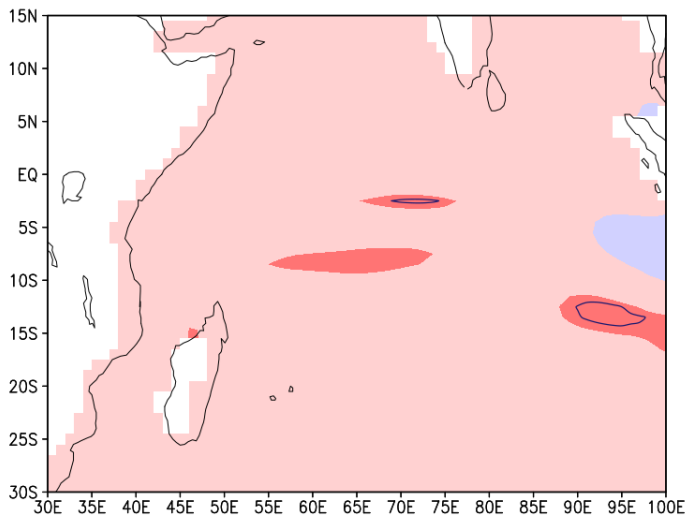

-1

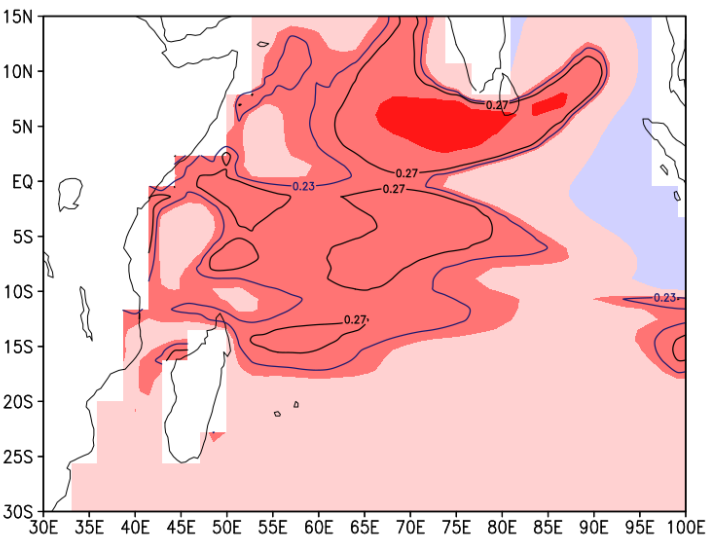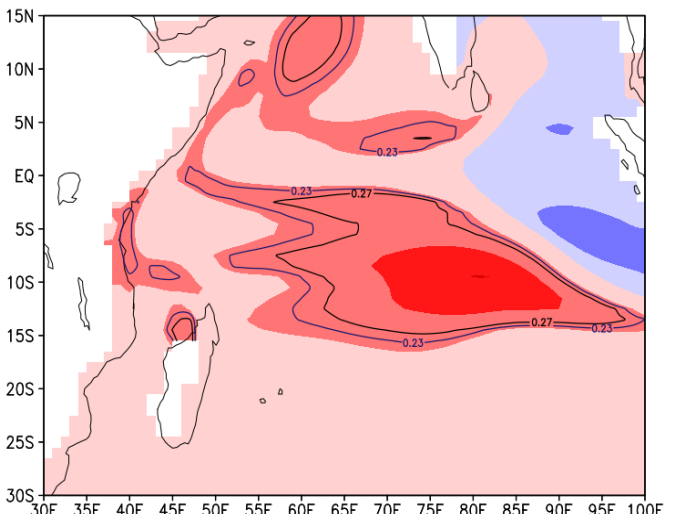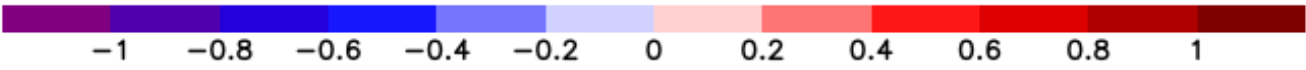

Supplement: Supplementary file 1 [file 30893779]
